# Supplementary material for: A novel method for Tn antigen detection based on chemoenzymatic targeted labelling and CuAAC click chemistry
Source: Royal Society of Chemistry journal article supplement (doi:10.1039/d5cc05398f), 2025-12-23
Supplement: d5cc05398f1.xlsx [file d5cc05398f1.xlsx]

## Sheet: Content
Supplementary Tables S2-5
Table S2. Chemiluminescence intensity analysis to verify the feasibility and detection performance of the chemiluminescent detection method.
Table S3. Grayscale analysis of BSA before and after the introduction of IAA into the CuAAC reaction system.
Table S4. Intensity changes of biotinylated peptide segments before and after the introduction of IAA into the CuAAC reaction system.
Table S5. Grayscale analysis for validating the feasibility and detection performance of the Tn antigen detection method.

## Sheet: Table S2
Table S2. Chemiluminescence intensity analysis to verify the feasibility and detection performance of the highly sensitive chemiluminescent detection method.
a. Chemiluminescence intensity analysis to validate the feasibility of the highly sensitive chemiluminescent detection technique.					b. Chemiluminescence intensity analysis to evaluate the detection performance of the highly sensitive chemiluminescent detection technique.
Protein Amount (ng)	NHS-C2-N3 ester	Chemiluminescence intensityX105			Protein Amount (ng)	Chemiluminescence intensityX105	Chemiluminescence intensityX105	Mean chemiluminescence intensityX105
10	-	0.08494			7.5	17.8366	14.2785	16.0576
10	+	4.56321			5	11.2838	10.7001	10.992
100	-	0.09441			2.5	7.4732	5.23628	6.35474
100	+	7.92247			1	2.84179	1.73181	2.2868
					0.5	1.01631	0.95353	0.98492
					0.1	0.40372	0.44451	0.424115
					0	0.54111	0.36919	0.45515

## Sheet: Table S3
Table S3. Grayscale intensity analysis of BSA and serum proteins before and after the introduction of IAA into the CuAAC reaction system.
a.Grayscale Analysis of BSA Background Labeling Before IAA Introduction					b.Grayscale Analysis of the Inhibitory Effect of IAA Introduction on BSA Background Labeling
	Repeat 1	Repeat 2				Biotin-PEG4-Alkyne			Biotin-PEG4-Alkyne+IAA
protein concentration（μg/μL）	gray scale (inch)	gray scale (inch)				Repeat 1	Repeat 2		Repeat 1	Repeat 2
0.1	2.192	2.607			protein concentration（μg/μL）	gray scale (pixels×104)	gray scale (pixels×104)	mean gray scale (pixels×104)	gray scale (pixels×104)	gray scale (pixels×104)	mean gray scale (pixels×104)	Decrease in Grayscale Value
0.2	5.377	5.977			0.1	5.0508	7.1483	6.09955	1.1904	1.421	1.3057	0.781
0.5	10.108	10.905			0.2	10.2264	12.1506	11.1885	1.6401	1.6095	1.6248	0.85
					0.5	32.728	39.111	35.9195	7.6793	6.8069	7.2431	0.798

## Sheet: Table S4
Table S4. Intensity changes of biotinylated peptide segments before and after the introduction of IAA into the CuAAC reaction system
a. Intensity Changes of Biotinylated SQYLQQCPFDEHVK Before and After IAA Introduction						b. Intensity Changes of Biotinylated SLHTLFGDELCK Before and After IAA Introduction
	Repeat 1	Repeat 2					Repeat 1	Repeat 2
	intensity	intensity	mean intensity	SD			intensity	intensity	mean intensity	SD
Biotin-PEG4-Alkyne	1418420000	1533130000	1475775000	81107100		Biotin-PEG4-Alkyne	466854000	513357000	490106000	32882000
Biotin-PEG4-Alkyne+IAA	52134600	49427200	50780900	1.91447e+06		Biotin-PEG4-Alkyne+IAA	82651000	89432700	86041900	4.79539e+06

## Sheet: Table S5
Table S5. Grayscale analysis for validating the feasibility, detection performance, and specificity of the Tn antigen detection method
a. Grayscale Analysis to Verify the Feasibility of the Tn Antigen Detection Method							b. Grayscale Analysis to Evaluate the Detection Performance of the Tn Antigen Detection Method
	Repeat 1	Repeat 2	Repeat 3						Repeat 1	Repeat 2	Repeat 3
	gray scale (inch)	gray scale (inch)	gray scale (inch)	mean gray scale (inch)	SD		Proetin concentration (nM)	Protein amount (μg)	gray scale (inch)	gray scale (inch)	gray scale (inch)	mean gray scale (inch)	SD
C1	0.033	0.038	0.035	0.0353333	0.00252		6.9	0.16	0.044	0.02	0.019	0.02767	0.01415
C2	0.293	0.255	0.271	0.273	0.01908		13	0.3	0.11	0.116	0.069	0.09833	0.02558
S	0.935	0.929	0.775	0.879667	0.09069		26	0.6	0.161	0.226	0.138	0.175	0.04564
							52	1.2	0.292	0.383	0.238	0.30433	0.07328
							86	2	0.447	0.662	0.457	0.522	0.12135
							138	3.2	0.656	0.982	0.707	0.78167	0.17536
